# Supplementary material for: The Female-Biased General Odorant Binding Protein 2 of Semiothisa cinerearia Displays Binding Affinity for Biologically Active Host Plant Volatiles
Source: MDPI journal article supplement (doi:10.3390/biology13040274), 2024-04-18
Supplement: s1 [file s1]

Supplementary Information for

**The female-biased general odorant binding protein 2 of *Semiothisa cinerearia* displays binding affinity to biologically active host plant volatiles**

**Jingjing Tu<sup>1,2</sup>, Zehua Wang<sup>1</sup>, Fan Yang<sup>1</sup>, Han Liu<sup>1</sup>, Guanghang Qiao<sup>1</sup>, Aihuan Zhang<sup>2</sup> and Shanning Wang<sup>1,\*</sup>**

<sup>1</sup> Key Laboratory of Environment Friendly Management on Fruit and Vegetable Pests in North China (Coconstructed by the Ministry and Province), Ministry of Agriculture and Rural Affairs, Institute of Plant and Environment Protection, Beijing Academy of Agriculture and Forestry Sciences, Beijing 100097, China; 15910506265@163.com (J.T.); wangzehua200707@163.com (Z.W.); evelynyangfan@163.com (F.Y.); 15230451215@163.com (H.L.); qghang98@126.com (G.Q.)

<sup>2</sup> College of Bioscience and Resources Environment, Beijing University of Agriculture, Beijing 102206, China; zhangaihuan@126.com

\* Correspondence: wangshanning@yeah.net

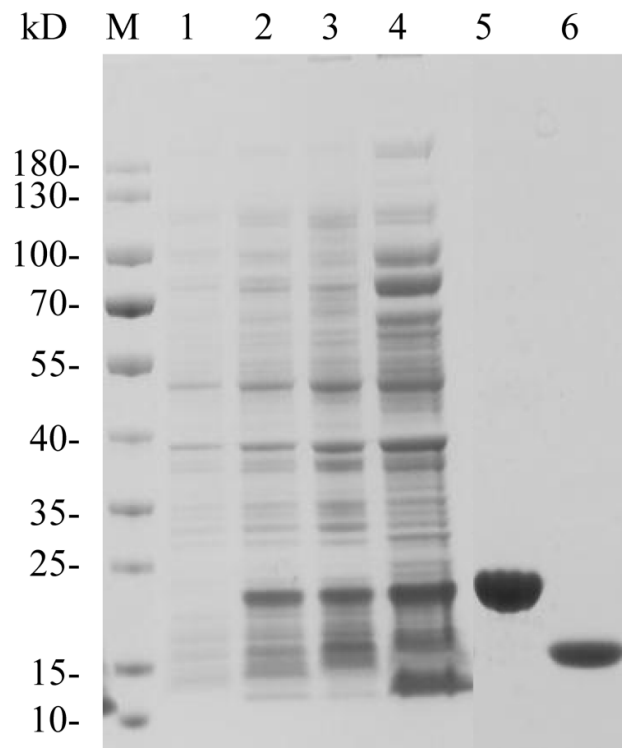

**Figure S1.** SDS-PAGE analysis of the recombinant ScinGOBP2. M: molecular weight markers, 1: cell pellet before induction with IPTG, 2: cell pellet after induction, 3: pellet after sonication, 4: supernatant after sonication, 5: protein purified by affinity chromatography, and 6: purified protein after digestion with enterokinase.

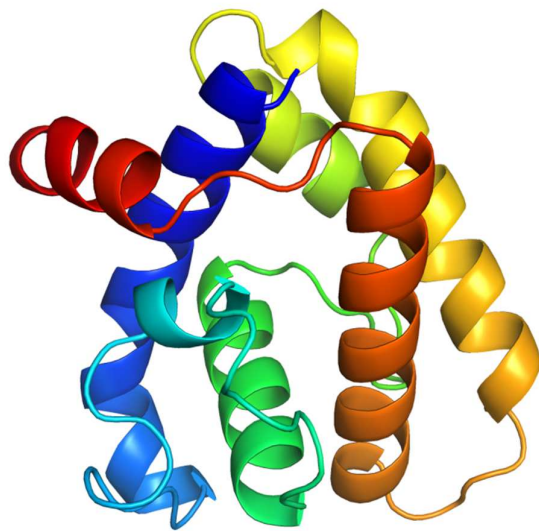

**Figure S2.** Three-dimensional (3D) structure of ScinGOBP2.

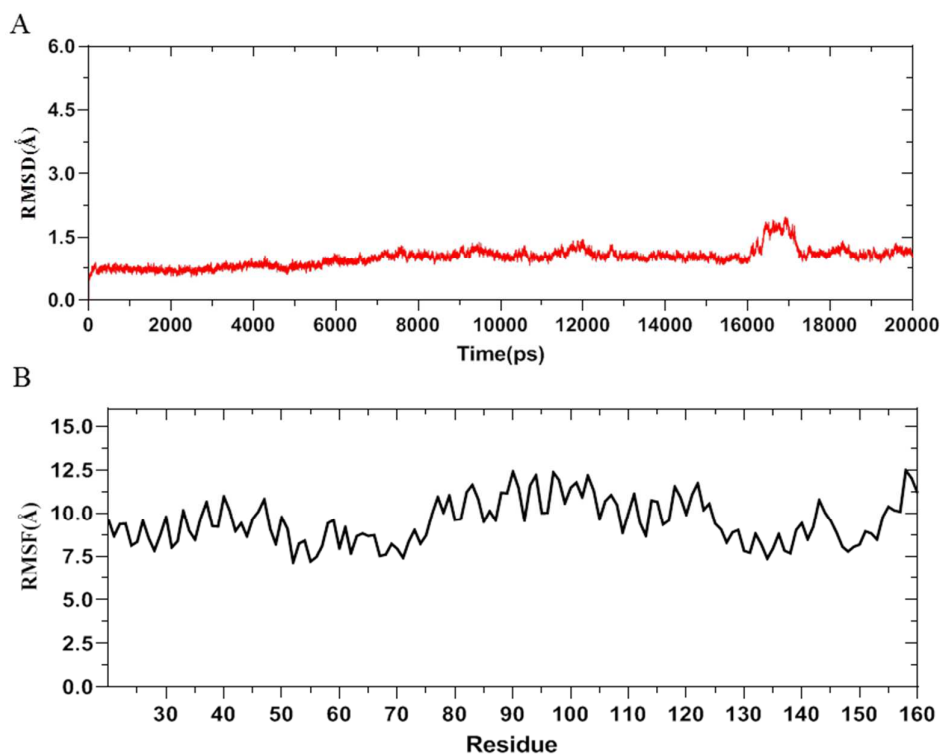

**Figure S3.** MD simulation results of ScinGOBP2. (A) RMSD plot showing the conformational changes of the protein till 20000 ps. (B) RMSF plot showing residue fluctuations for 20000 ps.

Program: ERRAT2  
 File: MD.pdb  
 Chain#:  
 Overall quality factor\*\*: 97.849

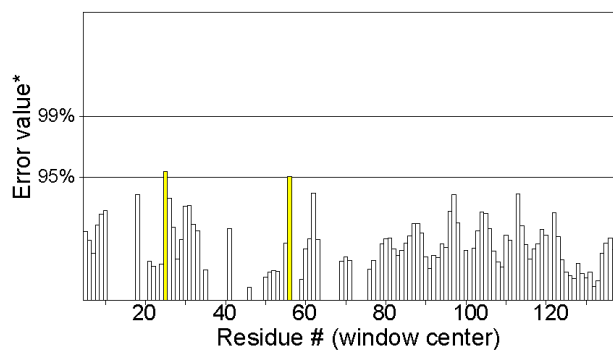

\*On the error axis, two lines are drawn to indicate the confidence with which it is possible to reject regions that exceed that error value.

\*\*Expressed as the percentage of the protein for which the calculated error value falls below the 95% rejection limit. Good high resolution structures generally produce values around 95% or higher. For lower resolutions (2.5 to 3Å) the average overall quality factor is around 91%.

**Figure S4.** ERRAT results from the predicted 3D model of ScinGOBP2.

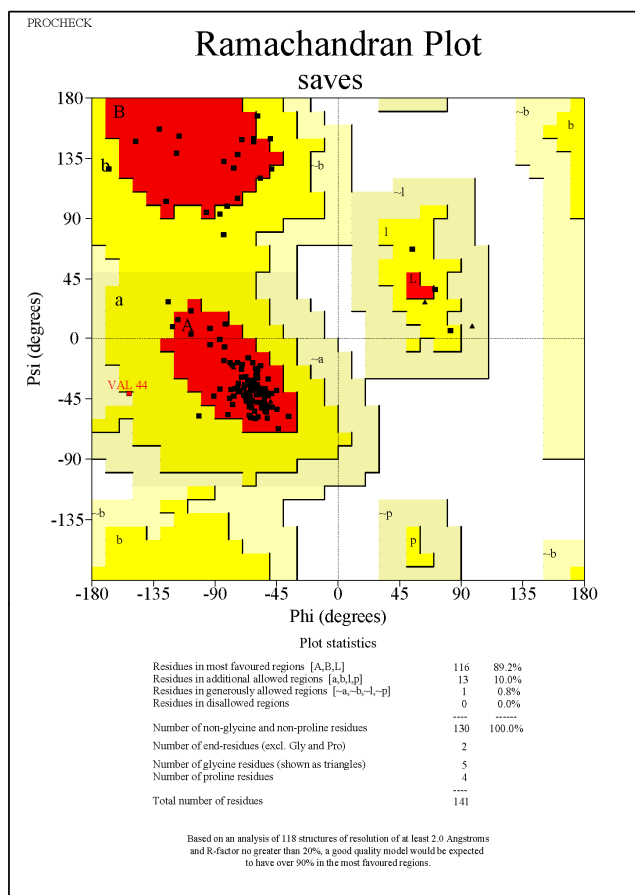

**Figure S5.** PROCHECK results from the predicted 3D model of ScinGOBP2.

**Table S1.** Primers used in this study.

| Gene           | Forward primer (5'-3')     | Reverse primer (5'-3')    |
|----------------|----------------------------|---------------------------|
| Gene cloning   |                            |                           |
| <i>GOBP2</i>   | ATGTCAGAGCCGCTAGTGG        | CTAATACTGTTCTAAAACAGC     |
| RT-PCT         |                            |                           |
| <i>GOBP2</i>   | TCCCCAAACATATTAGAAGAGTTCCA | TTCCAAAACAGCCTCAATCATGG   |
| <i>β-actin</i> | CCTACAACCTCCATCATGAAGTGTGA | GTATTCCTGTTTCGAGATCCACATC |
| qRT-PCT        |                            |                           |
| <i>GOBP2</i>   | CTGTTGATGGTAGCGGTGGT       | TGAGAGCCTTCCCAAAGTGC      |
| <i>β-actin</i> | CAGAAGGACTCGTACGTGGG       | GTAGAACGTGTGGTGCCAGA      |
| <i>TBP</i>     | CCACTACCTGCAGAACGTGT       | GTTTGAGAGCGGGCAGTTTG      |
